# Supplementary material for: A high density SLAF-seq SNP genetic map and QTL for seed size, oil and protein content in upland cotton
Source: PubMed Central journal article supplement (PMC6647295; doi:10.1186/s12864-019-5819-6), 2019-07-22
Supplement: 12864_2019_5819_MOESM7_ESM.pdf [file 12864_2019_5819_MOESM7_ESM.pdf]

A01

|      |           |
|------|-----------|
| 0.0  | Marker4   |
| 0.1  | Marker5   |
| 0.2  | Marker6   |
| 0.3  | Marker7   |
| 0.4  | Marker8   |
| 0.5  | Marker9   |
| 0.6  | Marker10  |
| 0.7  | Marker11  |
| 0.8  | Marker12  |
| 0.9  | Marker13  |
| 1.0  | Marker14  |
| 1.1  | Marker15  |
| 1.2  | Marker16  |
| 1.3  | Marker17  |
| 1.4  | Marker18  |
| 1.5  | Marker19  |
| 1.6  | Marker20  |
| 1.7  | Marker21  |
| 1.8  | Marker22  |
| 1.9  | Marker23  |
| 2.0  | Marker24  |
| 2.1  | Marker25  |
| 2.2  | Marker26  |
| 2.3  | Marker27  |
| 2.4  | Marker28  |
| 2.5  | Marker29  |
| 2.6  | Marker30  |
| 2.7  | Marker31  |
| 2.8  | Marker32  |
| 2.9  | Marker33  |
| 3.0  | Marker34  |
| 3.1  | Marker35  |
| 3.2  | Marker36  |
| 3.3  | Marker37  |
| 3.4  | Marker38  |
| 3.5  | Marker39  |
| 3.6  | Marker40  |
| 3.7  | Marker41  |
| 3.8  | Marker42  |
| 3.9  | Marker43  |
| 4.0  | Marker44  |
| 4.1  | Marker45  |
| 4.2  | Marker46  |
| 4.3  | Marker47  |
| 4.4  | Marker48  |
| 4.5  | Marker49  |
| 4.6  | Marker50  |
| 4.7  | Marker51  |
| 4.8  | Marker52  |
| 4.9  | Marker53  |
| 5.0  | Marker54  |
| 5.1  | Marker55  |
| 5.2  | Marker56  |
| 5.3  | Marker57  |
| 5.4  | Marker58  |
| 5.5  | Marker59  |
| 5.6  | Marker60  |
| 5.7  | Marker61  |
| 5.8  | Marker62  |
| 5.9  | Marker63  |
| 6.0  | Marker64  |
| 6.1  | Marker65  |
| 6.2  | Marker66  |
| 6.3  | Marker67  |
| 6.4  | Marker68  |
| 6.5  | Marker69  |
| 6.6  | Marker70  |
| 6.7  | Marker71  |
| 6.8  | Marker72  |
| 6.9  | Marker73  |
| 7.0  | Marker74  |
| 7.1  | Marker75  |
| 7.2  | Marker76  |
| 7.3  | Marker77  |
| 7.4  | Marker78  |
| 7.5  | Marker79  |
| 7.6  | Marker80  |
| 7.7  | Marker81  |
| 7.8  | Marker82  |
| 7.9  | Marker83  |
| 8.0  | Marker84  |
| 8.1  | Marker85  |
| 8.2  | Marker86  |
| 8.3  | Marker87  |
| 8.4  | Marker88  |
| 8.5  | Marker89  |
| 8.6  | Marker90  |
| 8.7  | Marker91  |
| 8.8  | Marker92  |
| 8.9  | Marker93  |
| 9.0  | Marker94  |
| 9.1  | Marker95  |
| 9.2  | Marker96  |
| 9.3  | Marker97  |
| 9.4  | Marker98  |
| 9.5  | Marker99  |
| 9.6  | Marker100 |
| 9.7  | Marker101 |
| 9.8  | Marker102 |
| 9.9  | Marker103 |
| 10.0 | Marker104 |

A02

|      |           |
|------|-----------|
| 0.0  | Marker260 |
| 0.1  | Marker261 |
| 0.2  | Marker262 |
| 0.3  | Marker263 |
| 0.4  | Marker264 |
| 0.5  | Marker265 |
| 0.6  | Marker266 |
| 0.7  | Marker267 |
| 0.8  | Marker268 |
| 0.9  | Marker269 |
| 1.0  | Marker270 |
| 1.1  | Marker271 |
| 1.2  | Marker272 |
| 1.3  | Marker273 |
| 1.4  | Marker274 |
| 1.5  | Marker275 |
| 1.6  | Marker276 |
| 1.7  | Marker277 |
| 1.8  | Marker278 |
| 1.9  | Marker279 |
| 2.0  | Marker280 |
| 2.1  | Marker281 |
| 2.2  | Marker282 |
| 2.3  | Marker283 |
| 2.4  | Marker284 |
| 2.5  | Marker285 |
| 2.6  | Marker286 |
| 2.7  | Marker287 |
| 2.8  | Marker288 |
| 2.9  | Marker289 |
| 3.0  | Marker290 |
| 3.1  | Marker291 |
| 3.2  | Marker292 |
| 3.3  | Marker293 |
| 3.4  | Marker294 |
| 3.5  | Marker295 |
| 3.6  | Marker296 |
| 3.7  | Marker297 |
| 3.8  | Marker298 |
| 3.9  | Marker299 |
| 4.0  | Marker300 |
| 4.1  | Marker301 |
| 4.2  | Marker302 |
| 4.3  | Marker303 |
| 4.4  | Marker304 |
| 4.5  | Marker305 |
| 4.6  | Marker306 |
| 4.7  | Marker307 |
| 4.8  | Marker308 |
| 4.9  | Marker309 |
| 5.0  | Marker310 |
| 5.1  | Marker311 |
| 5.2  | Marker312 |
| 5.3  | Marker313 |
| 5.4  | Marker314 |
| 5.5  | Marker315 |
| 5.6  | Marker316 |
| 5.7  | Marker317 |
| 5.8  | Marker318 |
| 5.9  | Marker319 |
| 6.0  | Marker320 |
| 6.1  | Marker321 |
| 6.2  | Marker322 |
| 6.3  | Marker323 |
| 6.4  | Marker324 |
| 6.5  | Marker325 |
| 6.6  | Marker326 |
| 6.7  | Marker327 |
| 6.8  | Marker328 |
| 6.9  | Marker329 |
| 7.0  | Marker330 |
| 7.1  | Marker331 |
| 7.2  | Marker332 |
| 7.3  | Marker333 |
| 7.4  | Marker334 |
| 7.5  | Marker335 |
| 7.6  | Marker336 |
| 7.7  | Marker337 |
| 7.8  | Marker338 |
| 7.9  | Marker339 |
| 8.0  | Marker340 |
| 8.1  | Marker341 |
| 8.2  | Marker342 |
| 8.3  | Marker343 |
| 8.4  | Marker344 |
| 8.5  | Marker345 |
| 8.6  | Marker346 |
| 8.7  | Marker347 |
| 8.8  | Marker348 |
| 8.9  | Marker349 |
| 9.0  | Marker350 |
| 9.1  | Marker351 |
| 9.2  | Marker352 |
| 9.3  | Marker353 |
| 9.4  | Marker354 |
| 9.5  | Marker355 |
| 9.6  | Marker356 |
| 9.7  | Marker357 |
| 9.8  | Marker358 |
| 9.9  | Marker359 |
| 10.0 | Marker360 |

A03

|      |           |
|------|-----------|
| 0.0  | Marker811 |
| 0.1  | Marker812 |
| 0.2  | Marker813 |
| 0.3  | Marker814 |
| 0.4  | Marker815 |
| 0.5  | Marker816 |
| 0.6  | Marker817 |
| 0.7  | Marker818 |
| 0.8  | Marker819 |
| 0.9  | Marker820 |
| 1.0  | Marker821 |
| 1.1  | Marker822 |
| 1.2  | Marker823 |
| 1.3  | Marker824 |
| 1.4  | Marker825 |
| 1.5  | Marker826 |
| 1.6  | Marker827 |
| 1.7  | Marker828 |
| 1.8  | Marker829 |
| 1.9  | Marker830 |
| 2.0  | Marker831 |
| 2.1  | Marker832 |
| 2.2  | Marker833 |
| 2.3  | Marker834 |
| 2.4  | Marker835 |
| 2.5  | Marker836 |
| 2.6  | Marker837 |
| 2.7  | Marker838 |
| 2.8  | Marker839 |
| 2.9  | Marker840 |
| 3.0  | Marker841 |
| 3.1  | Marker842 |
| 3.2  | Marker843 |
| 3.3  | Marker844 |
| 3.4  | Marker845 |
| 3.5  | Marker846 |
| 3.6  | Marker847 |
| 3.7  | Marker848 |
| 3.8  | Marker849 |
| 3.9  | Marker850 |
| 4.0  | Marker851 |
| 4.1  | Marker852 |
| 4.2  | Marker853 |
| 4.3  | Marker854 |
| 4.4  | Marker855 |
| 4.5  | Marker856 |
| 4.6  | Marker857 |
| 4.7  | Marker858 |
| 4.8  | Marker859 |
| 4.9  | Marker860 |
| 5.0  | Marker861 |
| 5.1  | Marker862 |
| 5.2  | Marker863 |
| 5.3  | Marker864 |
| 5.4  | Marker865 |
| 5.5  | Marker866 |
| 5.6  | Marker867 |
| 5.7  | Marker868 |
| 5.8  | Marker869 |
| 5.9  | Marker870 |
| 6.0  | Marker871 |
| 6.1  | Marker872 |
| 6.2  | Marker873 |
| 6.3  | Marker874 |
| 6.4  | Marker875 |
| 6.5  | Marker876 |
| 6.6  | Marker877 |
| 6.7  | Marker878 |
| 6.8  | Marker879 |
| 6.9  | Marker880 |
| 7.0  | Marker881 |
| 7.1  | Marker882 |
| 7.2  | Marker883 |
| 7.3  | Marker884 |
| 7.4  | Marker885 |
| 7.5  | Marker886 |
| 7.6  | Marker887 |
| 7.7  | Marker888 |
| 7.8  | Marker889 |
| 7.9  | Marker890 |
| 8.0  | Marker891 |
| 8.1  | Marker892 |
| 8.2  | Marker893 |
| 8.3  | Marker894 |
| 8.4  | Marker895 |
| 8.5  | Marker896 |
| 8.6  | Marker897 |
| 8.7  | Marker898 |
| 8.8  | Marker899 |
| 8.9  | Marker900 |
| 9.0  | Marker901 |
| 9.1  | Marker902 |
| 9.2  | Marker903 |
| 9.3  | Marker904 |
| 9.4  | Marker905 |
| 9.5  | Marker906 |
| 9.6  | Marker907 |
| 9.7  | Marker908 |
| 9.8  | Marker909 |
| 9.9  | Marker910 |
| 10.0 | Marker911 |

A04

|      |           |
|------|-----------|
| 0.0  | Marker540 |
| 0.1  | Marker541 |
| 0.2  | Marker542 |
| 0.3  | Marker543 |
| 0.4  | Marker544 |
| 0.5  | Marker545 |
| 0.6  | Marker546 |
| 0.7  | Marker547 |
| 0.8  | Marker548 |
| 0.9  | Marker549 |
| 1.0  | Marker550 |
| 1.1  | Marker551 |
| 1.2  | Marker552 |
| 1.3  | Marker553 |
| 1.4  | Marker554 |
| 1.5  | Marker555 |
| 1.6  | Marker556 |
| 1.7  | Marker557 |
| 1.8  | Marker558 |
| 1.9  | Marker559 |
| 2.0  | Marker560 |
| 2.1  | Marker561 |
| 2.2  | Marker562 |
| 2.3  | Marker563 |
| 2.4  | Marker564 |
| 2.5  | Marker565 |
| 2.6  | Marker566 |
| 2.7  | Marker567 |
| 2.8  | Marker568 |
| 2.9  | Marker569 |
| 3.0  | Marker570 |
| 3.1  | Marker571 |
| 3.2  | Marker572 |
| 3.3  | Marker573 |
| 3.4  | Marker574 |
| 3.5  | Marker575 |
| 3.6  | Marker576 |
| 3.7  | Marker577 |
| 3.8  | Marker578 |
| 3.9  | Marker579 |
| 4.0  | Marker580 |
| 4.1  | Marker581 |
| 4.2  | Marker582 |
| 4.3  | Marker583 |
| 4.4  | Marker584 |
| 4.5  | Marker585 |
| 4.6  | Marker586 |
| 4.7  | Marker587 |
| 4.8  | Marker588 |
| 4.9  | Marker589 |
| 5.0  | Marker590 |
| 5.1  | Marker591 |
| 5.2  | Marker592 |
| 5.3  | Marker593 |
| 5.4  | Marker594 |
| 5.5  | Marker595 |
| 5.6  | Marker596 |
| 5.7  | Marker597 |
| 5.8  | Marker598 |
| 5.9  | Marker599 |
| 6.0  | Marker600 |
| 6.1  | Marker601 |
| 6.2  | Marker602 |
| 6.3  | Marker603 |
| 6.4  | Marker604 |
| 6.5  | Marker605 |
| 6.6  | Marker606 |
| 6.7  | Marker607 |
| 6.8  | Marker608 |
| 6.9  | Marker609 |
| 7.0  | Marker610 |
| 7.1  | Marker611 |
| 7.2  | Marker612 |
| 7.3  | Marker613 |
| 7.4  | Marker614 |
| 7.5  | Marker615 |
| 7.6  | Marker616 |
| 7.7  | Marker617 |
| 7.8  | Marker618 |
| 7.9  | Marker619 |
| 8.0  | Marker620 |
| 8.1  | Marker621 |
| 8.2  | Marker622 |
| 8.3  | Marker623 |
| 8.4  | Marker624 |
| 8.5  | Marker625 |
| 8.6  | Marker626 |
| 8.7  | Marker627 |
| 8.8  | Marker628 |
| 8.9  | Marker629 |
| 9.0  | Marker630 |
| 9.1  | Marker631 |
| 9.2  | Marker632 |
| 9.3  | Marker633 |
| 9.4  | Marker634 |
| 9.5  | Marker635 |
| 9.6  | Marker636 |
| 9.7  | Marker637 |
| 9.8  | Marker638 |
| 9.9  | Marker639 |
| 10.0 | Marker640 |

A05

|      |           |
|------|-----------|
| 0.0  | Marker244 |
| 0.1  | Marker245 |
| 0.2  | Marker246 |
| 0.3  | Marker247 |
| 0.4  | Marker248 |
| 0.5  | Marker249 |
| 0.6  | Marker250 |
| 0.7  | Marker251 |
| 0.8  | Marker252 |
| 0.9  | Marker253 |
| 1.0  | Marker254 |
| 1.1  | Marker255 |
| 1.2  | Marker256 |
| 1.3  | Marker257 |
| 1.4  | Marker258 |
| 1.5  | Marker259 |
| 1.6  | Marker260 |
| 1.7  | Marker261 |
| 1.8  | Marker262 |
| 1.9  | Marker263 |
| 2.0  | Marker264 |
| 2.1  | Marker265 |
| 2.2  | Marker266 |
| 2.3  | Marker267 |
| 2.4  | Marker268 |
| 2.5  | Marker269 |
| 2.6  | Marker270 |
| 2.7  | Marker271 |
| 2.8  | Marker272 |
| 2.9  | Marker273 |
| 3.0  | Marker274 |
| 3.1  | Marker275 |
| 3.2  | Marker276 |
| 3.3  | Marker277 |
| 3.4  | Marker278 |
| 3.5  | Marker279 |
| 3.6  | Marker280 |
| 3.7  | Marker281 |
| 3.8  | Marker282 |
| 3.9  | Marker283 |
| 4.0  | Marker284 |
| 4.1  | Marker285 |
| 4.2  | Marker286 |
| 4.3  | Marker287 |
| 4.4  | Marker288 |
| 4.5  | Marker289 |
| 4.6  | Marker290 |
| 4.7  | Marker291 |
| 4.8  | Marker292 |
| 4.9  | Marker293 |
| 5.0  | Marker294 |
| 5.1  | Marker295 |
| 5.2  | Marker296 |
| 5.3  | Marker297 |
| 5.4  | Marker298 |
| 5.5  | Marker299 |
| 5.6  | Marker300 |
| 5.7  | Marker301 |
| 5.8  | Marker302 |
| 5.9  | Marker303 |
| 6.0  | Marker304 |
| 6.1  | Marker305 |
| 6.2  | Marker306 |
| 6.3  | Marker307 |
| 6.4  | Marker308 |
| 6.5  | Marker309 |
| 6.6  | Marker310 |
| 6.7  | Marker311 |
| 6.8  | Marker312 |
| 6.9  | Marker313 |
| 7.0  | Marker314 |
| 7.1  | Marker315 |
| 7.2  | Marker316 |
| 7.3  | Marker317 |
| 7.4  | Marker318 |
| 7.5  | Marker319 |
| 7.6  | Marker320 |
| 7.7  | Marker321 |
| 7.8  | Marker322 |
| 7.9  | Marker323 |
| 8.0  | Marker324 |
| 8.1  | Marker325 |
| 8.2  | Marker326 |
| 8.3  | Marker327 |
| 8.4  | Marker328 |
| 8.5  | Marker329 |
| 8.6  | Marker330 |
| 8.7  | Marker331 |
| 8.8  | Marker332 |
| 8.9  | Marker333 |
| 9.0  | Marker334 |
| 9.1  | Marker335 |
| 9.2  | Marker336 |
| 9.3  | Marker337 |
| 9.4  | Marker338 |
| 9.5  | Marker339 |
| 9.6  | Marker340 |
| 9.7  | Marker341 |
| 9.8  | Marker342 |
| 9.9  | Marker343 |
| 10.0 | Marker344 |

A06

|     |           |
|-----|-----------|
| 0.0 | Marker761 |
| 0.1 | Marker762 |
| 0.2 | Marker763 |
| 0.3 | Marker764 |
| 0.4 | Marker765 |
| 0.5 | Marker766 |
| 0.6 | Marker767 |
| 0.7 | Marker768 |
| 0.8 | Marker769 |
| 0.9 | Marker770 |
| 1.0 | Marker771 |
| 1.1 | Marker772 |
| 1.2 | Marker773 |
| 1.3 | Marker774 |
| 1.4 | Marker775 |
| 1.5 | Marker776 |
| 1.6 | Marker777 |
| 1.7 | Marker778 |
| 1.8 | Marker779 |
| 1.9 | Marker780 |
| 2.0 | Marker781 |
| 2.1 | Marker782 |
| 2.2 | Marker783 |
| 2.3 | Marker784 |
| 2.4 | Marker785 |
| 2.5 | Marker786 |
| 2.6 | Marker787 |
| 2.7 | Marker788 |
| 2.8 | Marker789 |
| 2.9 | Marker790 |
| 3.0 | Marker791 |
| 3.1 | Marker792 |
| 3.2 | Marker793 |
| 3.3 | Marker794 |
| 3.4 | Marker795 |
| 3.5 | Marker796 |
| 3.6 | Marker797 |
| 3.7 | Marker798 |
| 3.8 | Marker799 |
| 3.9 | Marker800 |
| 4.0 | Marker801 |
| 4.1 | Marker802 |
| 4.2 |           |
